# Supplementary material for: The intricate paramagnetic state of [Os(Q)2(bpy)]+, Q = 4,6-di-tert-butyl-o-iminobenzoquinone
Source: Royal Society of Chemistry journal article supplement (doi:10.1039/c2dt30903c), 2012-01-01
Supplement: c2dt30903c.pdf [file c2dt30903c.pdf]

## Supplementary Information

### **The intricate paramagnetic state of $[\text{Os}(\text{Q})_2(\text{bpy})]^+$ , $\text{Q} = 4,6\text{-di-tert-butyl-o-iminobenzoquinone}$**

Dipanwita Das,<sup>a</sup> Thomas Michael Scherer,<sup>b</sup> Amit Das,<sup>a</sup> Tapan Kumar Mondal,<sup>c</sup> Shaikh M. Mobin,<sup>a</sup> Jan Fiedler,<sup>d</sup> José Luis Priego,<sup>e</sup> Reyes Jiménez-Aparicio,<sup>\*e</sup> Wolfgang Kaim,<sup>\*b</sup> and Goutam Kumar Lahiri<sup>\*a</sup>

<sup>a</sup>*Department of Chemistry, Indian Institute of Technology Bombay, Powai, Mumbai-400076, India. E-mail: [lahiri@chem.iitb.ac.in](mailto:lahiri@chem.iitb.ac.in)*

<sup>b</sup>*Institut für Anorganische Chemie, Universität Stuttgart, Pfaffenwaldring 55, D-70550 Stuttgart, Germany. E-mail: [kaim@iac.uni-stuttgart.de](mailto:kaim@iac.uni-stuttgart.de)*

<sup>c</sup>*Department of Chemistry, Jadavpur University, Jadavpur, Kolkata-700032, India*

<sup>d</sup>*J. Heyrovský Institute of Physical Chemistry, v.v.i., Academy of Sciences of the Czech Republic, Dolejškova 3, CZ-18223 Prague, Czech Republic*

<sup>e</sup>*Departamento de Química Inorgánica, Facultad de Ciencias Químicas, Universidad Complutense, Ciudad Universitaria, E-28040 Madrid, Spain*

**Table S1** Calculated energy

| <b>1<sup>+</sup></b>                                                                                            |                | <b>1<sup>2+</sup></b>                                                                                       |                | <b>1</b>                                                                                                    |                |
|-----------------------------------------------------------------------------------------------------------------|----------------|-------------------------------------------------------------------------------------------------------------|----------------|-------------------------------------------------------------------------------------------------------------|----------------|
| <i>S</i> = 1/2                                                                                                  | <i>S</i> = 3/2 | <i>S</i> = 0                                                                                                | <i>S</i> = 1   | <i>S</i> = 0                                                                                                | <i>S</i> = 1   |
| -2400.35904646                                                                                                  | -2400.33965818 | -2400.07040917                                                                                              | -2400.04976041 | -2400.53698675                                                                                              | -2400.52957060 |
| a.u.                                                                                                            | a.u.           | a.u.                                                                                                        | a.u.           | a.u.                                                                                                        | a.u.           |
| E( <i>S</i> = 1/2) - E( <i>S</i> = 3/2) = -0.01938828 a.u.<br>= -12.166 kcal/mol<br>= -4255.24 cm <sup>-1</sup> |                | E( <i>S</i> = 0) - E( <i>S</i> = 1) = -0.02064876 a.u.<br>= -12.957 kcal/mol<br>= -4531.88 cm <sup>-1</sup> |                | E( <i>S</i> = 0) - E( <i>S</i> = 1) = -0.00741615 a.u.<br>= -4.6537 kcal/mol<br>= -1627.66 cm <sup>-1</sup> |                |

**Table S2** Selected experimental bond angles ( $^{\circ}$ ) for [1]ClO<sub>4</sub> and calculated bond angles for **1**<sup>+</sup>, **1**<sup>2+</sup>, **1** and **1**<sup>-</sup>

| Bond angles | <b>1</b> <sup>+</sup> ( <i>S</i> =1/2) |       | <b>1</b> <sup>2+</sup> ( <i>S</i> =0) | <b>1</b> ( <i>S</i> =0) | <b>1</b> <sup>-</sup> ( <i>S</i> =1/2) |
|-------------|----------------------------------------|-------|---------------------------------------|-------------------------|----------------------------------------|
|             | X-ray                                  | DFT   | DFT                                   | DFT                     | DFT                                    |
| N1-Os1-O1   | 78.78(16)                              | 77.21 | 76.21                                 | 78.19                   | 77.76                                  |
| N1-Os1-O2   | 91.93(16)                              | 91.42 | 90.70                                 | 91.24                   | 89.28                                  |
| N1-Os1-N2   | 168.09(18)                             | 165.2 | 161.1                                 | 165.2                   | 162.7                                  |
| N1-Os1-N3   | 101.73(17)                             | 98.26 | 98.07                                 | 100.2                   | 99.68                                  |
| N1-Os1-N4   | 93.62(18)                              | 93.57 | 96.65                                 | 90.67                   | 93.07                                  |
| N2-Os1-O1   | 93.21(15)                              | 93.07 | 90.71                                 | 91.41                   | 90.76                                  |
| N2-Os1-O2   | 79.02(17)                              | 77.18 | 76.22                                 | 78.28                   | 77.90                                  |
| N2-Os1-N3   | 87.44(17)                              | 92.47 | 96.61                                 | 90.89                   | 93.10                                  |
| N2-Os1-N4   | 95.75(18)                              | 98.61 | 98.06                                 | 100.5                   | 100.9                                  |
| N3-Os1-O1   | 171.94(19)                             | 172.6 | 170.2                                 | 175.0                   | 173.0                                  |
| N3-Os1-O2   | 98.96(17)                              | 96.99 | 94.69                                 | 97.99                   | 95.81                                  |
| N3-Os1-N4   | 77.90(18)                              | 77.53 | 77.91                                 | 77.21                   | 77.85                                  |
| N4-Os1-O1   | 94.04(17)                              | 96.77 | 94.71                                 | 98.06                   | 95.76                                  |
| N4-Os1-O2   | 174.09(19)                             | 173.0 | 170.2                                 | 175.0                   | 173.5                                  |
| O1-Os1-O2   | 89.04(15)                              | 89.03 | 77.91                                 | 86.75                   | 90.63                                  |

**Table S3** Selected molecular orbitals along with their energies and compositions for

$1^+$  in doublet ( $S=1/2$ ) state

| MO             | Energy (eV) | % of Composition |     |    |
|----------------|-------------|------------------|-----|----|
|                |             | Q                | bpy | Os |
| $\alpha$ -spin |             |                  |     |    |
| LUMO+5         | -2.56       | 94               | 01  | 05 |
| LUMO+4         | -2.77       | 85               | 03  | 12 |
| LUMO+3         | -3.72       | 01               | 95  | 04 |
| LUMO+2         | -3.86       | 02               | 94  | 04 |
| LUMO+1         | -4.78       | 02               | 91  | 07 |
| LUMO           | -5.34       | 61               | 04  | 35 |
| SOMO           | -7.07       | 92               | 02  | 06 |
| HOMO-1         | -7.61       | 41               | 04  | 55 |
| HOMO-2         | -7.99       | 37               | 13  | 50 |
| HOMO-3         | -8.39       | 55               | 03  | 42 |
| HOMO-4         | -8.51       | 89               | 02  | 09 |
| HOMO-5         | -8.79       | 75               | 03  | 22 |
| HOMO-6         | -8.98       | 92               | 02  | 06 |
| HOMO-7         | -9.18       | 96               | 01  | 03 |
| HOMO-8         | -9.27       | 98               | 01  | 01 |
| HOMO-9         | -9.29       | 99               | 0   | 01 |
| HOMO-10        | -9.68       | 01               | 98  | 01 |
| $\beta$ -spin  |             |                  |     |    |
| LUMO+5         | -2.75       | 84               | 03  | 13 |
| LUMO+4         | -3.72       | 01               | 95  | 04 |
| LUMO+3         | -3.85       | 02               | 93  | 05 |
| LUMO+2         | -4.77       | 03               | 89  | 08 |
| LUMO+1         | -4.99       | 76               | 03  | 21 |
| LUMO           | -5.70       | 91               | 03  | 06 |
| HOMO           | -7.54       | 47               | 04  | 49 |
| HOMO-1         | -7.85       | 40               | 13  | 47 |
| HOMO-2         | -8.32       | 45               | 04  | 51 |
| HOMO-3         | -8.39       | 84               | 03  | 13 |
| HOMO-4         | -8.70       | 68               | 03  | 29 |
| HOMO-5         | -8.93       | 94               | 02  | 04 |
| HOMO-6         | -9.17       | 95               | 01  | 04 |
| HOMO-7         | -9.26       | 98               | 01  | 01 |
| HOMO-8         | -9.27       | 99               | 0   | 01 |
| HOMO-9         | -9.68       | 01               | 98  | 01 |
| HOMO-10        | -10.01      | 97               | 01  | 02 |

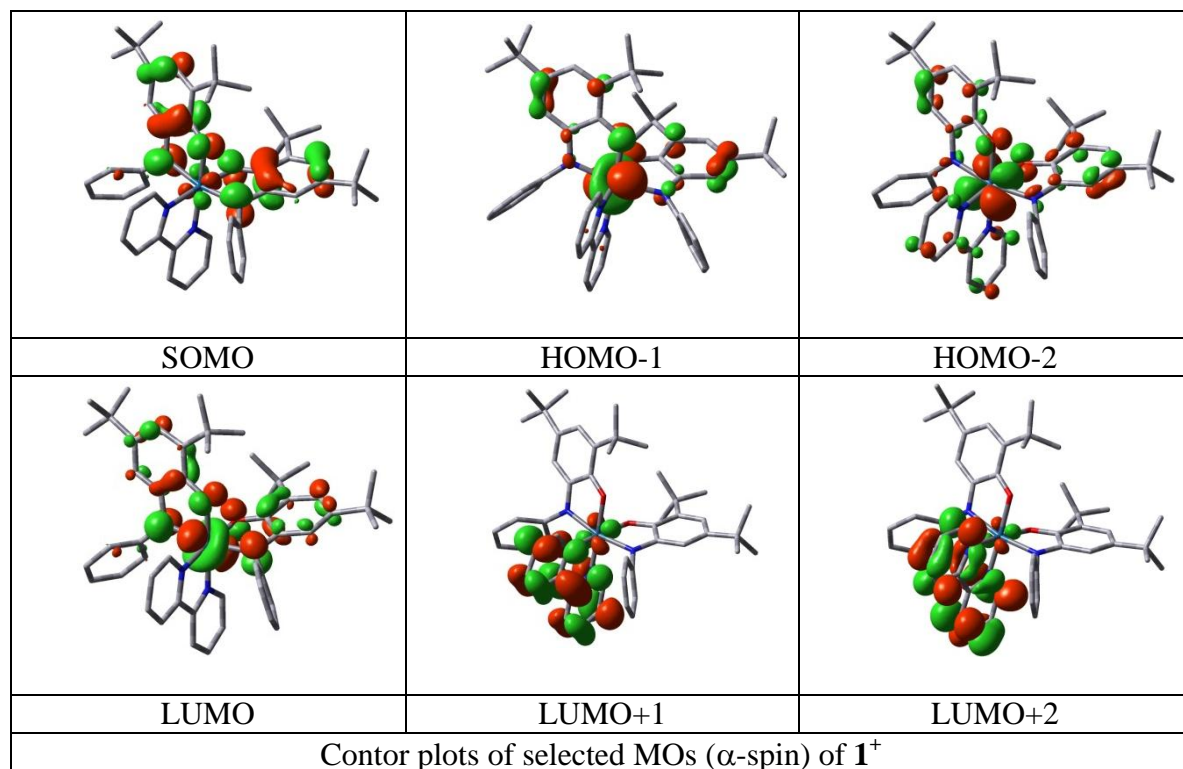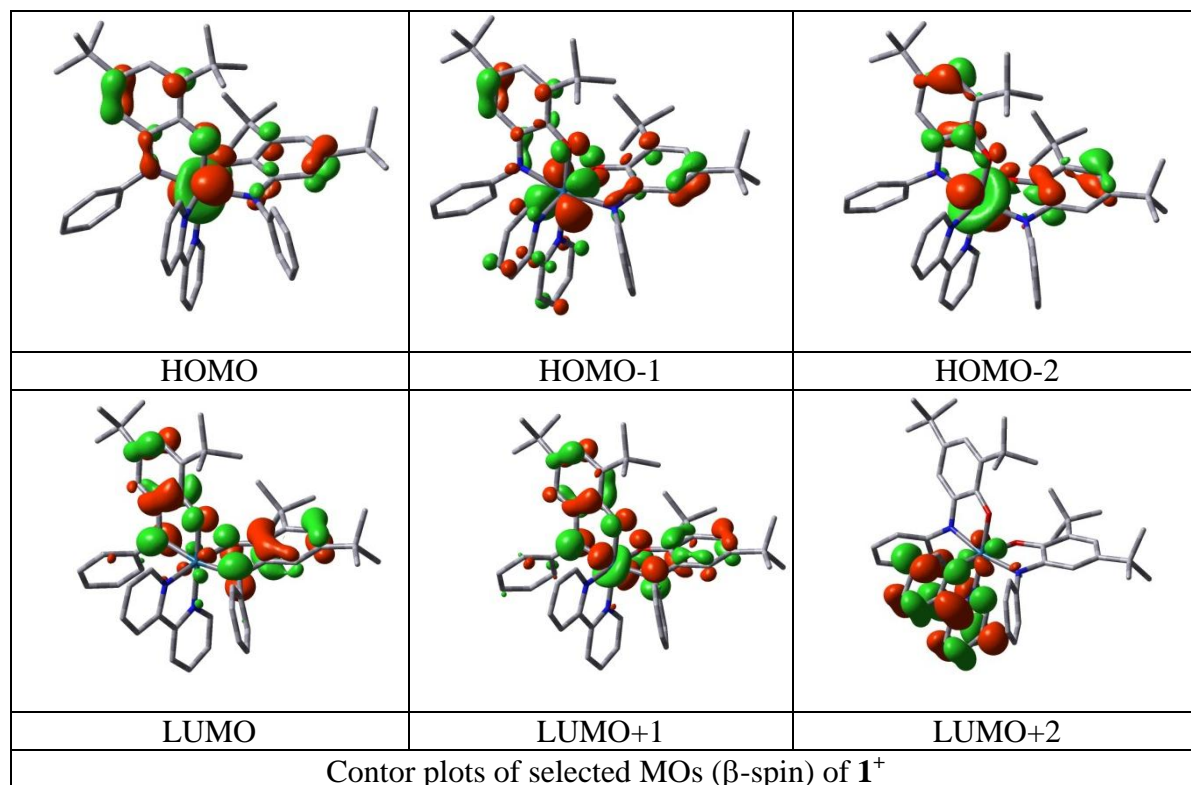

**Table S4** Selected molecular orbitals along with their energies and compositions for

$\mathbf{1}^{2+}$  in singlet ( $S=0$ ) state

| MO      | Energy (eV) | % of Composition |     |    |
|---------|-------------|------------------|-----|----|
|         |             | Q                | bpy | Os |
| LUMO+5  | -5.45       | 74               | 02  | 24 |
| LUMO+4  | -6.40       | 01               | 96  | 03 |
| LUMO+3  | -6.48       | 02               | 94  | 04 |
| LUMO+2  | -7.43       | 04               | 88  | 08 |
| LUMO+1  | -8.41       | 74               | 02  | 24 |
| LUMO    | -8.67       | 79               | 09  | 12 |
| HOMO    | -10.79      | 66               | 07  | 27 |
| HOMO-1  | -10.85      | 51               | 03  | 46 |
| HOMO-2  | -11.26      | 58               | 04  | 38 |
| HOMO-3  | -11.56      | 87               | 03  | 10 |
| HOMO-4  | -11.56      | 70               | 02  | 28 |
| HOMO-5  | -11.66      | 85               | 05  | 10 |
| HOMO-6  | -11.77      | 96               | 02  | 02 |
| HOMO-7  | -11.82      | 97               | 01  | 02 |
| HOMO-8  | -11.94      | 81               | 02  | 17 |
| HOMO-9  | -12.33      | 02               | 97  | 01 |
| HOMO-10 | -12.81      | 98               | 01  | 01 |

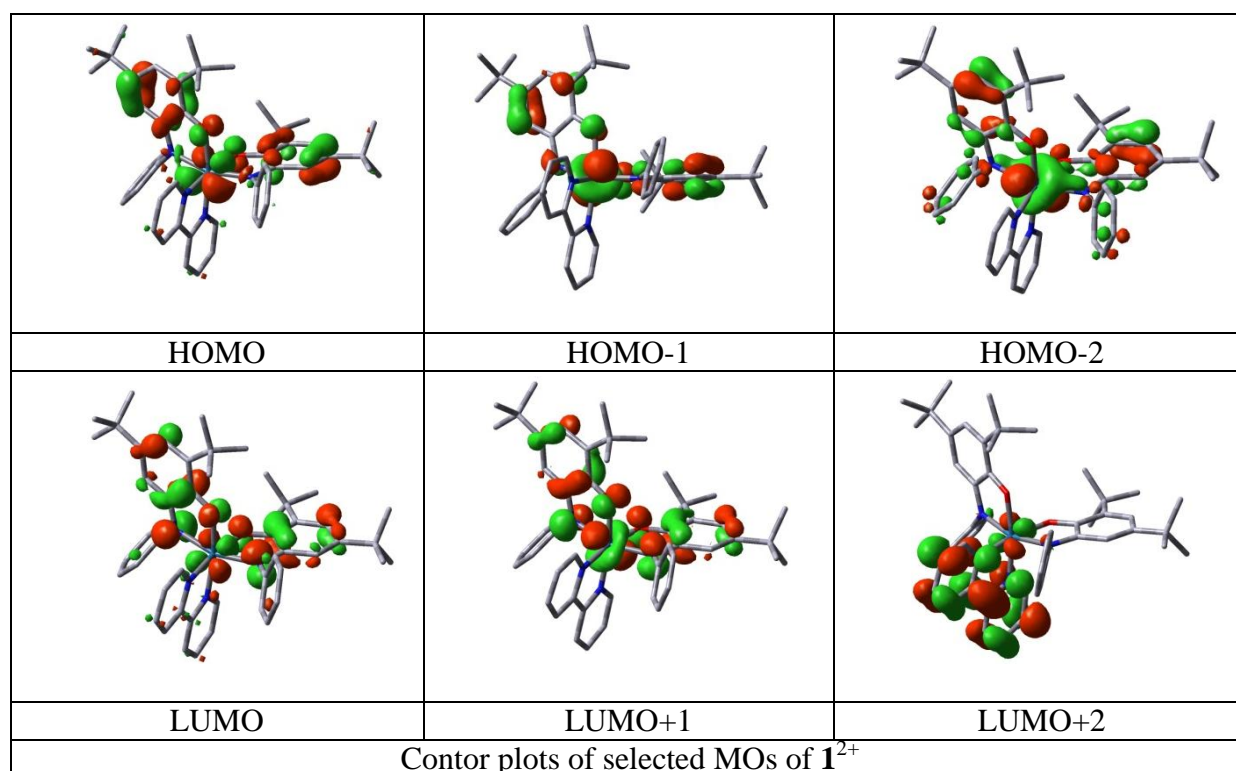

**Table S5** Energy and composition of some selected MOs of **1** in singlet ( $S=0$ ) state

| MO      | energy (eV) | % of composition |     |    |
|---------|-------------|------------------|-----|----|
|         |             | Q                | bpy | Os |
| LUMO+5  | 0.02        | 87               | 02  | 11 |
| LUMO+4  | -0.07       | 89               | 01  | 10 |
| LUMO+3  | -1.20       | 04               | 90  | 06 |
| LUMO+2  | -1.34       | 02               | 92  | 06 |
| LUMO+1  | -2.22       | 04               | 85  | 11 |
| LUMO    | -2.23       | 54               | 08  | 38 |
| HOMO    | -4.03       | 96               | 01  | 03 |
| HOMO-1  | -4.58       | 53               | 03  | 44 |
| HOMO-2  | -5.05       | 50               | 14  | 36 |
| HOMO-3  | -5.45       | 66               | 09  | 25 |
| HOMO-4  | -5.48       | 55               | 03  | 42 |
| HOMO-5  | -5.76       | 65               | 03  | 32 |
| HOMO-6  | -6.20       | 99               | 0   | 01 |
| HOMO-7  | -6.49       | 95               | 01  | 04 |
| HOMO-8  | -6.71       | 98               | 01  | 01 |
| HOMO-9  | -6.73       | 99               | 0   | 01 |
| HOMO-10 | -7.14       | 90               | 05  | 05 |

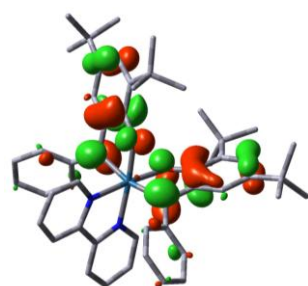

HOMO

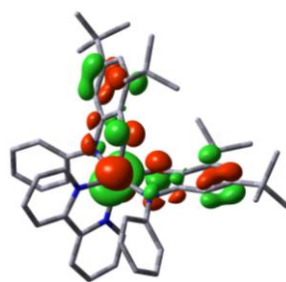

HOMO-1

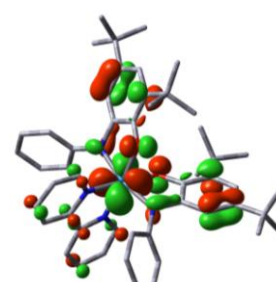

HOMO-2

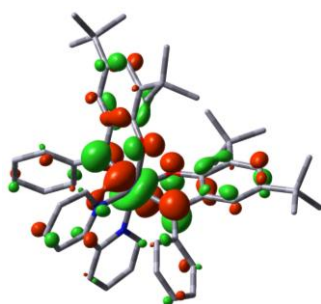

LUMO

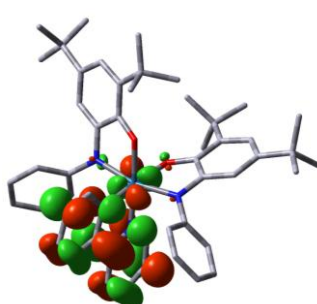

LUMO+1

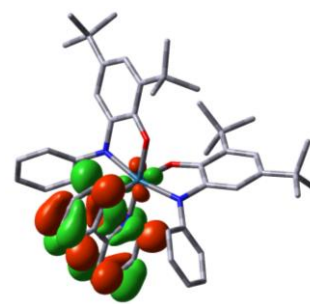

LUMO+2

Contour plots of selected MOs of **1**

**Table S6** Selected molecular orbitals along with their energies and compositions for

$1^-$  in doublet ( $S=1/2$ ) state

| MO             | Energy (eV) | % of Composition |     |    |
|----------------|-------------|------------------|-----|----|
|                |             | Q                | bpy | Os |
| $\alpha$ -spin |             |                  |     |    |
| LUMO+5         | 2.64        | 66               | 01  | 33 |
| LUMO+4         | 2.54        | 86               | 03  | 11 |
| LUMO+3         | 5.50        | 79               | 01  | 20 |
| LUMO+2         | 1.66        | 01               | 94  | 05 |
| LUMO+1         | 1.57        | 02               | 91  | 07 |
| LUMO           | 0.69        | 04               | 84  | 12 |
| SOMO           | -0.74       | 76               | 02  | 22 |
| HOMO-1         | -1.20       | 86               | 07  | 07 |
| HOMO-2         | -1.78       | 41               | 05  | 54 |
| HOMO-3         | -2.25       | 50               | 16  | 34 |
| HOMO-4         | -2.73       | 76               | 06  | 18 |
| HOMO-5         | -2.85       | 55               | 06  | 39 |
| HOMO-6         | -2.99       | 67               | 03  | 30 |
| HOMO-7         | -3.49       | 97               | 01  | 02 |
| HOMO-8         | -3.79       | 95               | 02  | 03 |
| HOMO-9         | -4.04       | 98               | 01  | 01 |
| HOMO-10        | -4.18       | 79               | 20  | 01 |
| $\beta$ -spin  |             |                  |     |    |
| LUMO+5         | 2.59        | 90               | 02  | 08 |
| LUMO+4         | 2.52        | 73               | 03  | 24 |
| LUMO+3         | 1.68        | 07               | 82  | 11 |
| LUMO+2         | 1.61        | 03               | 86  | 11 |
| LUMO+1         | 0.82        | 51               | 17  | 32 |
| LUMO           | 0.72        | 10               | 69  | 21 |
| HOMO           | -0.84       | 79               | 16  | 05 |
| HOMO-1         | -1.53       | 40               | 06  | 54 |
| HOMO-2         | -1.95       | 45               | 17  | 38 |
| HOMO-3         | -2.15       | 60               | 04  | 36 |
| HOMO-4         | -2.56       | 84               | 05  | 11 |
| HOMO-5         | -2.83       | 73               | 03  | 24 |
| HOMO-6         | -3.43       | 98               | 01  | 01 |
| HOMO-7         | -3.75       | 96               | 02  | 02 |
| HOMO-8         | -4.02       | 99               | 01  | 0  |
| HOMO-9         | -4.17       | 86               | 12  | 02 |
| HOMO-10        | -4.19       | 91               | 05  | 04 |



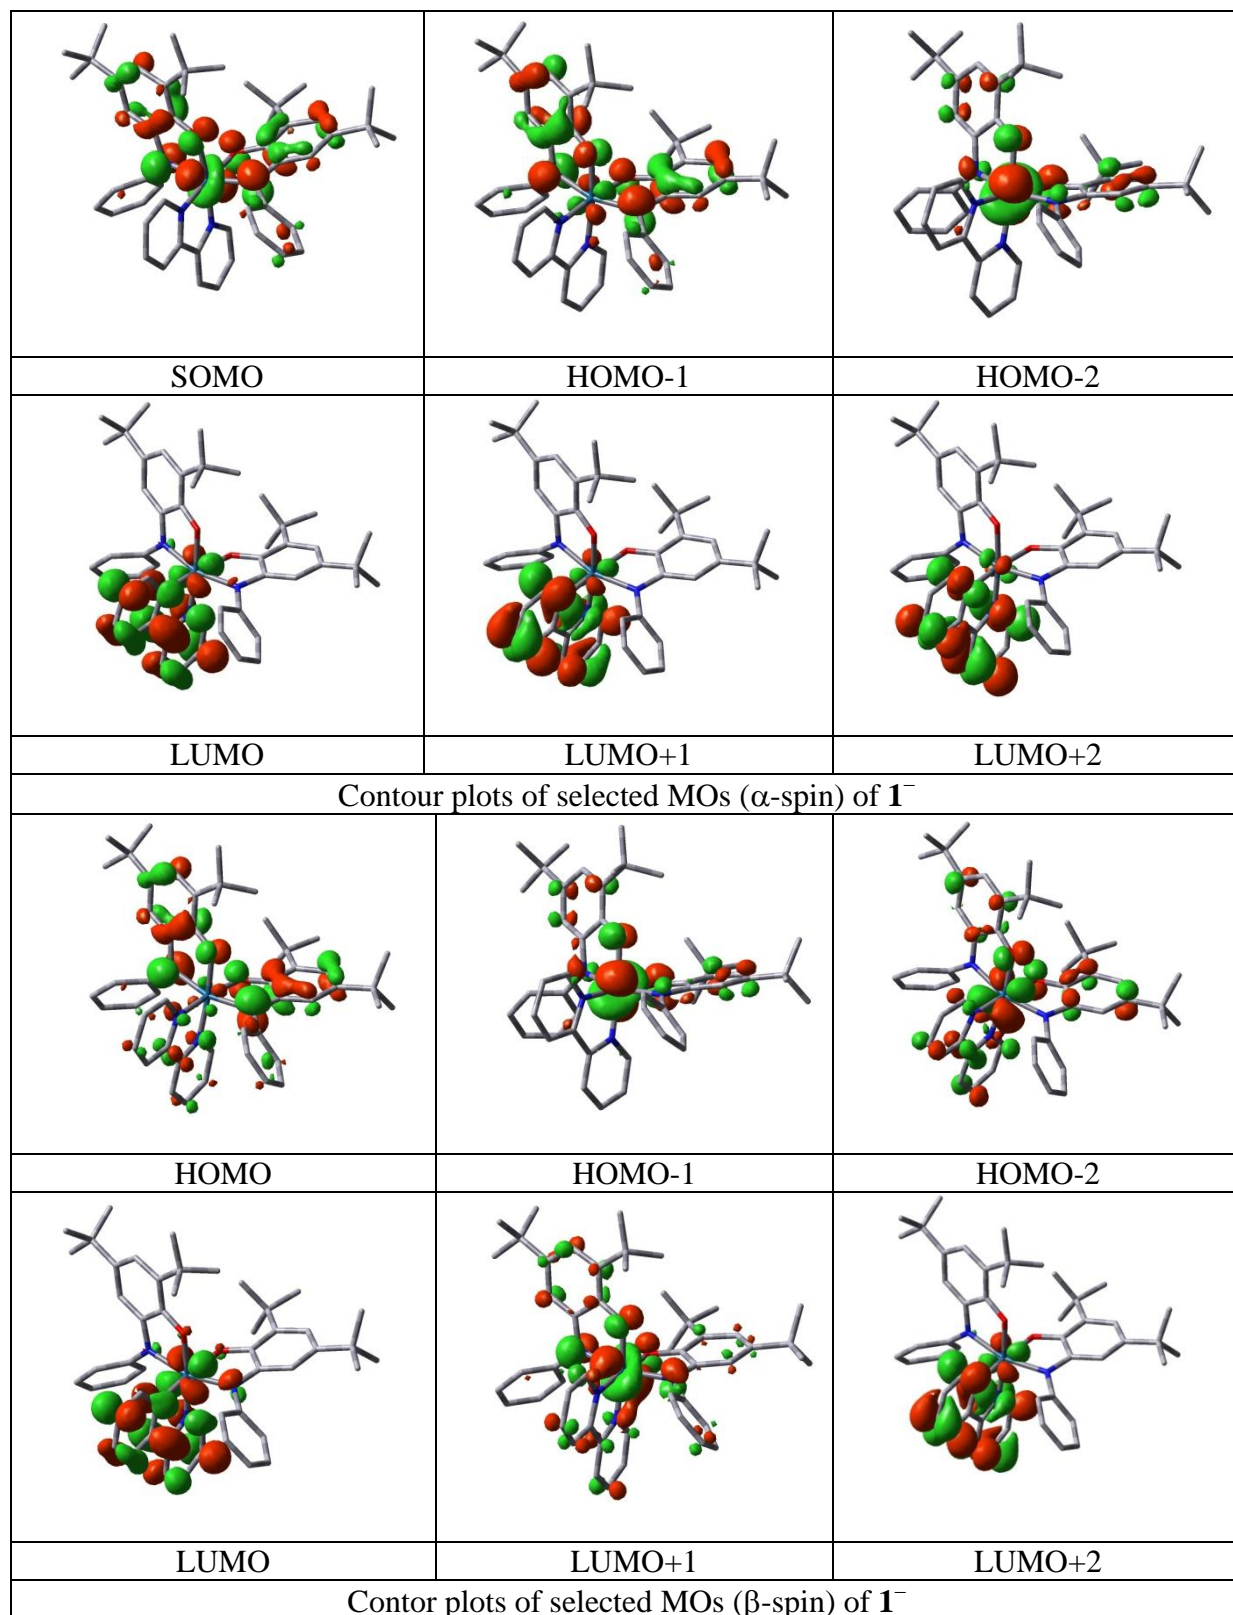

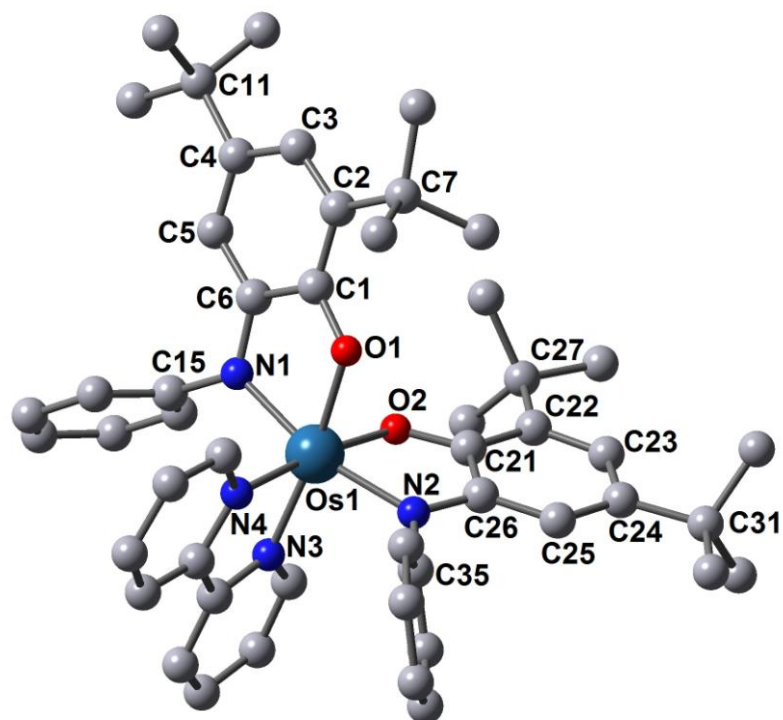

**Fig. S1** Optimised structure of **1<sup>+</sup>**.

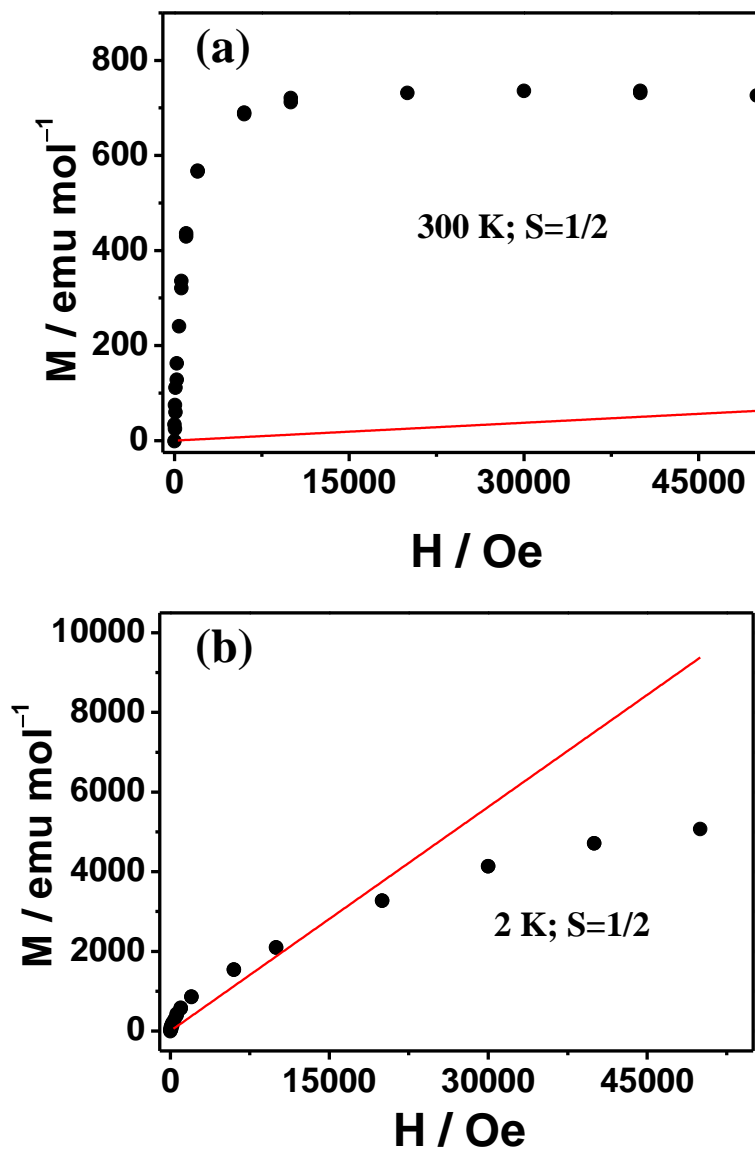

**Fig. S2** Representation of the magnetisation towards magnetic field from 0 to 5 T of  $[1]\text{ClO}_4$  measured at (a) 300 K and (b) 2 K. Solid line represents the calculated curve for  $S = 1/2$  spin system.

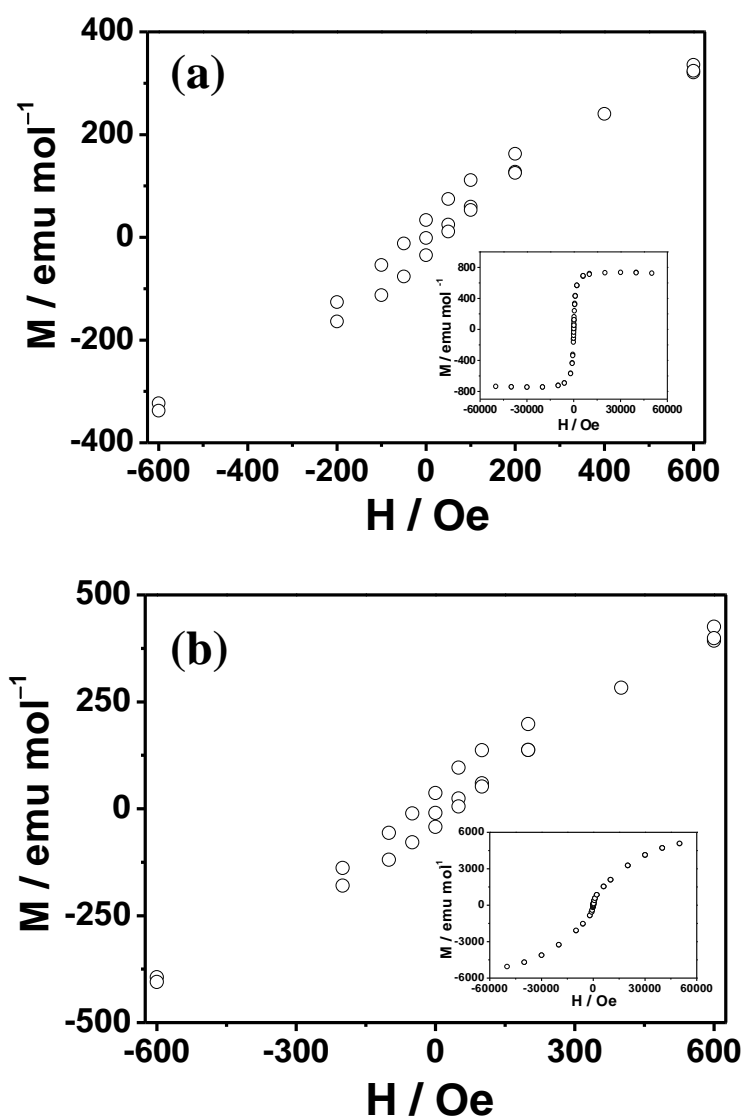

**Fig. S3** Detail of the loop at (a) 300 K and (b) 2 K showing hysteresis. Inset shows the complete curve from 5 to  $-5$  T.
